# Supplementary material for: Mapping snow depth in alpine terrain with unmanned aerial systems (UASs): potential and limitations
Source: Copernicus journal article supplement (doi:10.5194/tc-10-1075-2016), 2016-05-23
Supplement: Supplementary file [file tc-10-1075-2016-supplement-title-page.pdf › tc-10-1075-2016-supplement-title-page.pdf]

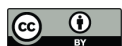

## *Supplement of*

# **Mapping snow depth in alpine terrain with unmanned aerial systems (UASs): potential and limitations**

**Yves Bühler et al.**

*Correspondence to:* Yves Bühler (buehler@slf.ch)

- tc-10-1075-2016-supplement-title-page.pdf
- Braema\_legend.mp4

The copyright of individual parts of the supplement might differ from the CC-BY 3.0 licence.
